# Supplementary material
Source: PubMed Central journal article supplement (PMC3338256)
Supplement: supp_111.137190_FigureS2.pdf [file supp_111.137190_FigureS2.pdf]

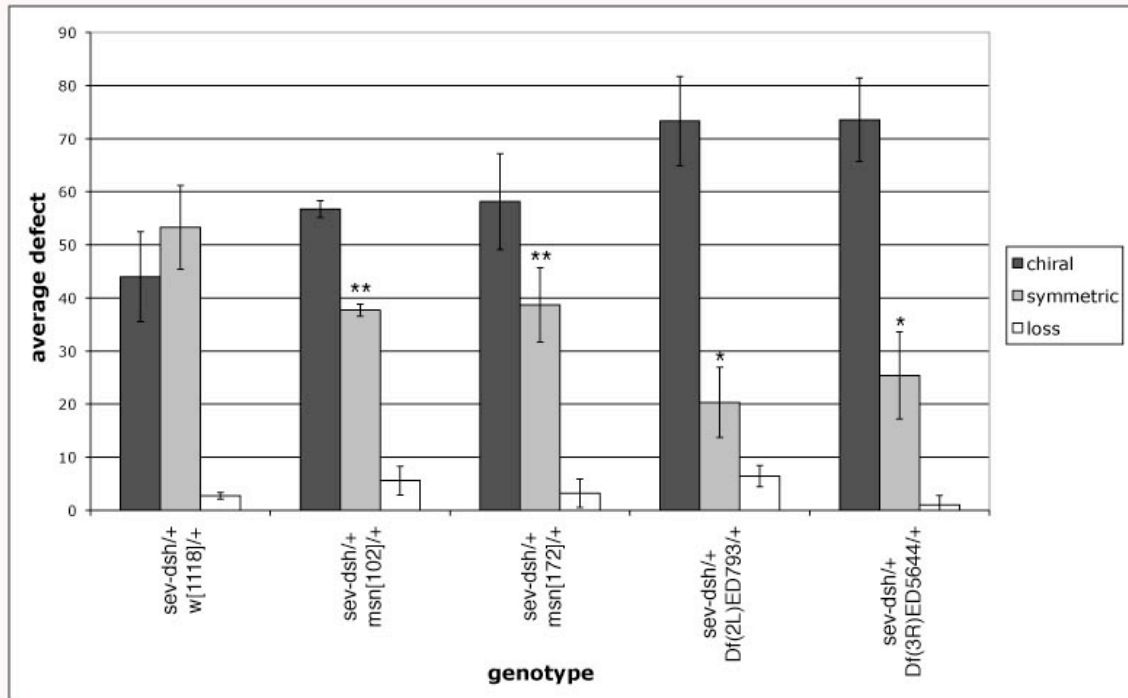

**Figure S2** Graph summarizing suppression of *sev-dsh* by two DrosDel deficiencies. Eye sections of 4 eyes were analyzed for ommatidial chirality of indicated genotypes. *Df(2L)ED793* and *Df(3R)ED5644* significantly suppressed *sev-dsh* induced PCP defects of symmetrical photoreceptor arrangement (\*= $P < 0.003$ ). For comparison, the strength of suppression by *misshapen* (*msn*), an established downstream effector of Fz/Dsh signaling in the eye, is shown (\*\*= $P < 0.03$ ) (Paricio et al. 1999). 2-3 eyes and 200-350 ommatidia were evaluated per genotype.
