# Supplementary material
Source: PubMed Central journal article supplement (PMC3338256)
Supplement: supp_111.137190_FigureS3.pdf [file supp_111.137190_FigureS3.pdf]

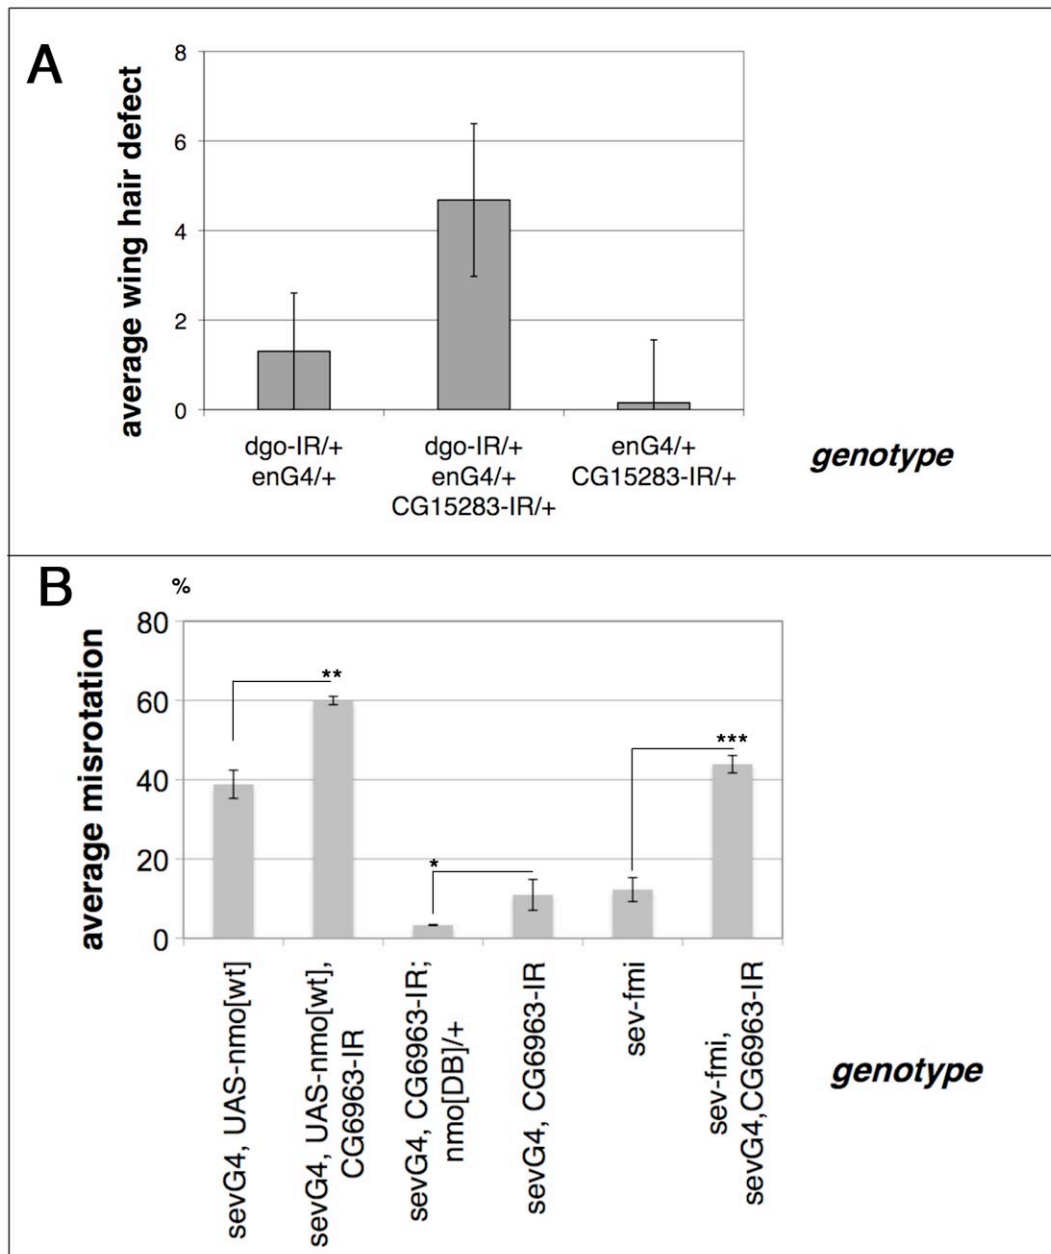

**Figure S3** (A) Independent assay confirming *dgo* and *CG15283* loss-of-function interaction. Graph shows average wing hair defects as observed in *en-GAL4*, *UAS-dgo-IR* and enhancement by *CG15283-IR* knockdown. 20 misoriented wing hairs at 45-180 degrees compared to wild-type were recorded as a value of 1 and n was 24-26 wings analyzed for each genotype. (B) Quantification of the rotation defects associated with the *sevGAL4*, *UAS-Nmo*, *CG6963-IR* and *sev-Stan/Fmi* genotypes. Note that *CG6963/CK1g* knock down enhances *Nmo* GOF rotation defects, whereas *nmo/+* suppresses the *CG6963-IR* defects, indicating an antagonistic relationship between these genes. In addition, rotation defects associated with *sev-Fmi/Stn* is enhanced by *CG6963-IR* knock down. P values are \* $<0.03$ , \*\* $<0.001$ , and \*\*\* $<0.0001$ , with the number of ommatidia analyzed being  $n=422-633$  in 3 eyes for each genotype.
