# Supplementary material
Source: PubMed Central journal article supplement (PMC3338256)
Supplement: supp_111.137190_TableS1.pdf [file supp_111.137190_TableS1.pdf]

**Table S1 DrosDel deficiencies, which showed no dominant external eye or wing modification of *sev-GAL4*, *UAS-dgo* and *sev-GAL4*, *UAS-pk* phenotype.**

|               |              |               |                |
|---------------|--------------|---------------|----------------|
| Df(1)ED404    | Df(1)ED409   | Df(1)ED6574   | Df(1)ED411     |
| Df(1)ED6630   | Df(1)ED6712  | Df(1)ED6802   | Df(1)ED418     |
| Df(1)ED6829   | Df(1)ED6991  | Df(1)ED7005   | Df(1)ED429     |
| Df(1)ED7067   | Df(1)ED7153  | Df(1)ED7217   | Df(1)ED7229    |
| Df(1)ED7294   | Df(1)ED7355  | Df(1)ED7413   | Df(1)ED6906    |
| Df(1)ED7664   | Df(1)ED6849  | Df(2L)ED2809  | Df(2L)ED5878   |
| Df(2L)ED19    | Df(2L)ED87   | Df(2L)ED94    | Df(2L)ED108    |
| Df(2L)ED125   | Df(2L)ED123  | Df(2L)ED136   | Df(2L)ED247    |
| Df(2L)ED284   | Df(2L)ED508  | Df(2L)ED647   | Df(2L)ED678    |
| Df(2L)ED690   | Df(2L)ED701  | Df(2L)ED737   | Df(2L)ED761    |
| Df(2L)ED778   | Df(2L)ED3    | Df(2L)ED1050  | Df(2L)ED1102   |
| Df(2L)ED1109  | Df(2L)ED1158 | Df(2L)ED1165  | Df(2L)ED1186   |
| Df(2L)ED1226  | Df(2L)ED1231 | Df(2L)ED1303  | Df(2L)ED1384   |
| Df(2L)ED1473  | Df(2R)ED1484 | Df(2R)ED1612  | Df(2R)ED1735   |
| Df(2R)ED2155  | Df(2R)ED2219 | Df(2R)ED9045  | Df(2R)ED2354   |
| Df(2R)ED2426  | Df(2R)ED2436 | Df(2R)ED1     | Df(2R)ED3610   |
| Df(2R)ED3923  | Df(2R)ED4061 | Df(2R)ED4071  | Df(2R)Exel6061 |
| Df(2R)ED1770  | Df(2R)ED2098 | Df(3L)ED4079  | Df(3L)ED4256   |
| Df(3L)ED4287  | Df(3L)ED4288 | Df(3L)ED4341  | Df(3L)ED4342   |
| Df(3L)ED210   | Df(3L)ED211  | Df(3L)ED4408  | Df(3L)ED4421   |
| Df(3L)ED4457  | Df(3L)ED4475 | Df(3L)ED215   | Df(3L)ED4486   |
| Df(3L)ED217   | Df(3L)ED218  | Df(3L)ED223   | Df(3L)ED4674   |
| Df(3L)ED4685  | Df(3L)ED4710 | Df(3L)ED224   | Df(3L)ED225    |
| Df(3L)ED4782  | Df(3L)ED4786 | Df(3L)ED228   | Df(3L)ED4799   |
| Df(3L)ED4978  | Df(3L)ED231  | Df(3R)ED4710  | Df(3R)ED5138   |
| Df(3R)ED5147  | Df(3R)ED5156 | Df(3R)ED5177  | Df(3R)ED5196   |
| Df(3R)ED5230  | Df(3R)ED5343 | Df(3R)ED5429  | Df(3R)ED5591   |
| Df(3R)ED5610  | Df(3R)ED5642 | Df(3R)ED10642 | Df(3R)ED5780   |
| Df(3R)ED2     | Df(3R)ED5911 | Df(3R)ED6025  | Df(3R)ED10809  |
| Df(3R)ED10820 | Df(3R)ED6093 | Df(3R)ED6103  | Df(3R)ED6187   |
| Df(3R)ED6235  | Df(3R)ED6255 | Df(3R)ED6265  | Df(3R)ED6310   |
| Df(3R)ED6316  | Df(3R)ED6332 | Df(3R)ED6346  | Df(3R)ED5071   |
| Df(4)ED6364   | Df(4)ED6369  | Df(4)ED6380   | Df(4)ED6382    |
| Df(4)ED6384   |              |               |                |
